# Supplementary material for: In vivo targeted imaging of early stage prostate cancer using a transferrin based near-infrared fluorescence probe
Source: Royal Society of Chemistry journal article supplement (doi:10.1039/c5ra06188a), 2015-01-01
Supplement: c5ra06188a1.pdf [file c5ra06188a1.pdf]

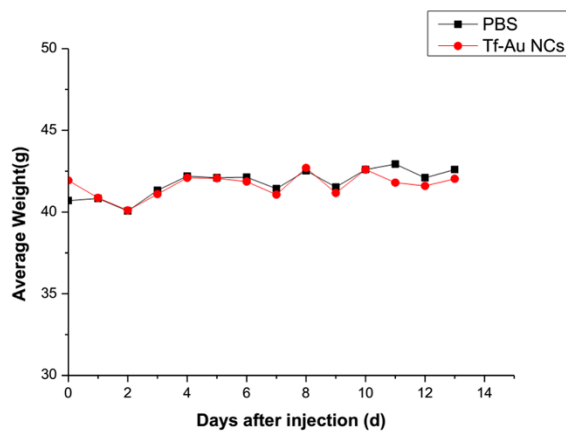

1. **Fig. S1** Average body weight of Kunming mice treated by Tf-Au NCs (8  $\mu$ g Au in 400  $\mu$ l for per mouse, red line) via tail veins or the same amount of PBS buffer solution (black line). Each group had 3 mice. No obvious weight loss was observed in both the two group during the observational period of 2-week post injection, indicating the good biocompatibility of the prepared Tf-Au NCs
